# Supplementary material
Source: PubMed Central journal article supplement (PMC7082123)
Supplement: NIHMS1571425-supplement-1.pdf [file NIHMS1571425-supplement-1.pdf]

**Cell Reports, Volume 30**

**Supplemental Information**

**Germline Features Associated  
with Immune Infiltration in Solid Tumors**

**Sahar Shahamatdar, Meng Xiao He, Matthew A. Reyna, Alexander Gusev, Saud H. AlDubayan, Eliezer M. Van Allen, and Sohini Ramachandran**

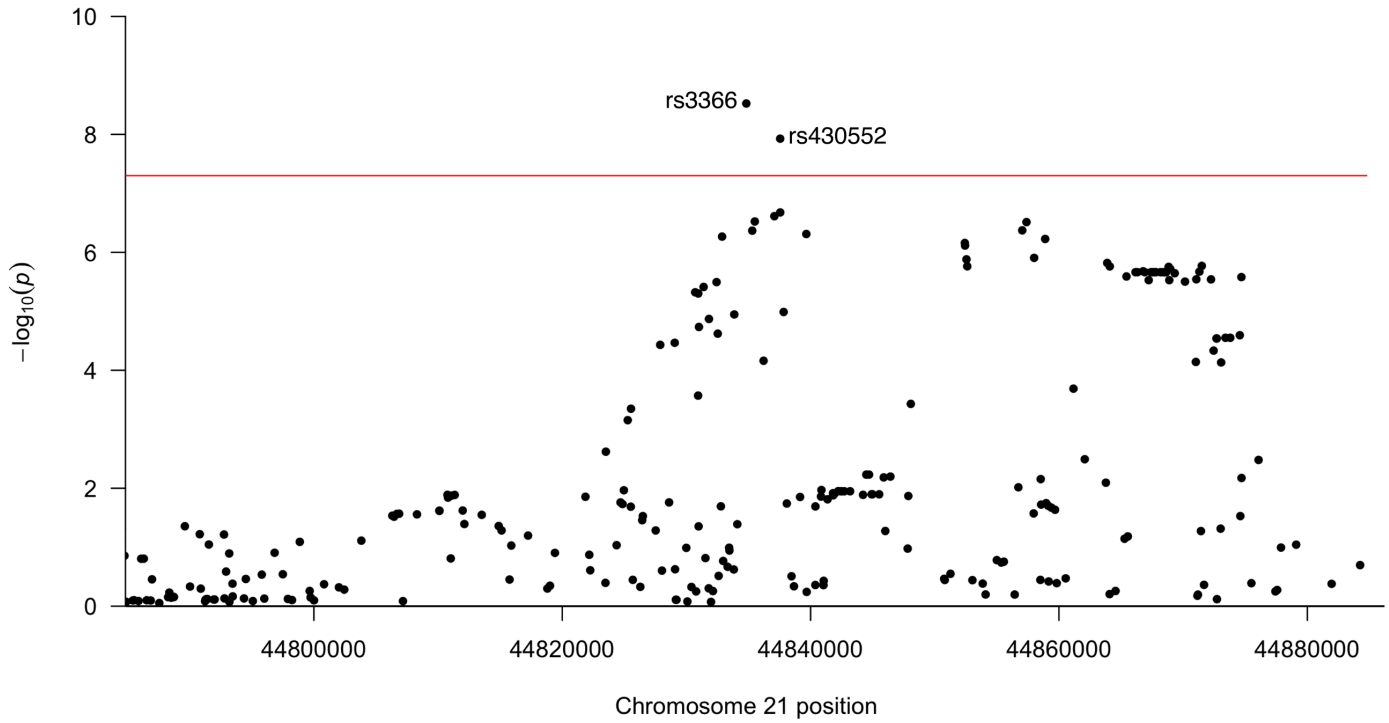

**Figure S1. Zoomed-in Manhattan plot for GWAS meta-analysis for the follicular helper T cell phenotype. Related to Figure 1B.** Positions along chromosome 21 are on the x-axis, and  $-\log_{10}$ -transformed p-values are on the y-axis. The red line indicates genome-wide significance ( $p < 5 \times 10^{-8}$ ). Two significant SNPs are annotated with ids.

**Table S3. Final number of SNPs included in the calculation of PRS for each of the five diseases at nine p-value thresholds. Related to Figure 4.** Summary statistics from the five studies were downloaded. SNPs were excluded based on the following criteria: absence from our genotyped data; missing odds ratios, risk alleles, or p-values; and ambiguous or mismatched variants. SNPs were further filtered via LD-clumping, with a 250kb window and an  $r^2$  threshold of 0.1.

| <b>p-value threshold</b> | <b>Rheumatoid arthritis</b> | <b>Ulcerative colitis</b> | <b>Celiac disease</b> | <b>Systemic lupus erythematosus</b> | <b>Multiple sclerosis</b> |
|--------------------------|-----------------------------|---------------------------|-----------------------|-------------------------------------|---------------------------|
| 1.00E+00                 | 206221                      | 112262                    | 87547                 | 236909                              | 85271                     |
| 1.00E-01                 | 44291                       | 33294                     | 21999                 | 63842                               | 20171                     |
| 1.00E-02                 | 6860                        | 7313                      | 3824                  | 12430                               | 3499                      |
| 1.00E-03                 | 1480                        | 1829                      | 659                   | 2401                                | 760                       |
| 1.00E-04                 | 564                         | 607                       | 158                   | 616                                 | 266                       |
| 1.00E-05                 | 386                         | 322                       | 59                    | 277                                 | 159                       |
| 1.00E-06                 | 310                         | 212                       | 29                    | 173                                 | 116                       |
| 1.00E-07                 | 260                         | 152                       | 16                    | 132                                 | 82                        |
| 5.00E-08                 | 251                         | 143                       | 13                    | 119                                 | 88                        |
